# Supplementary material for: Inferring Resilience to Fragmentation-Induced Changes in Plant Communities in a Semi-Arid Mediterranean Ecosystem
Source: PLoS One. 2015 Mar 19;10(3):e0118837. doi: 10.1371/journal.pone.0118837 (PMC4366014; doi:10.1371/journal.pone.0118837)
Supplement: S2 Table — Correlations between functional traits. (XLSX) [file pone.0118837.s006.xlsx]

## Sheet: Hoja1
S2 Table. Correlations between functional traits. Coefficient of Cramer´s V for nominal traits while Polychoric for ordinal traits. Note that associations between nominal vs. ordinal traits
NOMINAL TRAITS	Growth Form	Main Growth Form	Life cycle	Clonality	Potential spatial dispersal	Alternative spatial dispersal	Biological type	Pollination syndrome	Plant architecture
Growth Form	1	Cramer's V	Cramer's V	Cramer's V	Cramer's V	Cramer's V	Cramer's V	Cramer's V	Cramer's V
Main Growth Form	0.976157	1	Cramer's V	Cramer's V	Cramer's V	Cramer's V	Cramer's V	Cramer's V	Cramer's V
Life cycle	0.562551	0.54959	1	Cramer's V	Cramer's V	Cramer's V	Cramer's V	Cramer's V	Cramer's V
Clonality	0.481756	0.357845	0.284961	1	Cramer's V	Cramer's V	Cramer's V	Cramer's V	Cramer's V
Potential spatial dispersal	0.544549	0.131249	0.0861541	0.291208	1	Cramer's V	Cramer's V	Cramer's V	Cramer's V
Alternative spatial dispersal	0.57004	0.53716	0.273088	0.106725	0.433694	1	Cramer's V	Cramer's V	Cramer's V
Biological type	0.482436	0.515792	0.838999	0.411048	0.295321	0.267072	1	Cramer's V	Cramer's V
Pollination syndrome	0.875663	0.829282	0.273088	0.244152	0.249886	0.656433	0.344945	1	Cramer's V
Plant architecture	NaN	NaN	0.501	0.905999	0.691934	0.301756	NaN	0.563436	1
ORDINAL TRAITS	Plant height	Seed mass	Seed number
Plant height	1	Polychoric	Polychoric
Seed mass	0.5008	1	Polychoric
Seed number	0.395	-0.002894	1
